# Supplementary material for: Testing for associations and interactions between APOE e4 genotype and lifestyle, with brain structural imaging phenotypes in UK Biobank
Source: Research Square preprint supplement (doi:10.21203/rs.3.rs-6297741/v1), 2025-04-16
Supplement: Supplementary file 1 [file 9048bde3e47e34223765357a.docx]

**Title**: Testing for associations and interactions between *APOE* e4 genotype and lifestyle, with brain structural imaging phenotypes in UK Biobank

Table S1. Self-reported diseases exclusion

Table S2. Lifestyle factors source and definitions

Table S3. Variables included in general factors

Table S4. Lifestyle factors intercorrelations

Table S5. Associations between individual lifestyle factor and brain structural phenotypes

Table S6. Associations between simultaneous lifestyle factors and brain structural phenotypes

Table S7. Individual two-way interactions between APOE e4 genotype and lifestyle levels, on brain structural phenotypes

Table S8. Individual two-way interactions between APOE e4 genotype and each lifestyle factor, on brain structural phenotypes

Figure S1. Histogram of lifestyle scores

Figure S2. Flowchart of the study

Table S1. Self-reported diseases exclusion

| **Diseases** |
| --- |
| Brain cancer/primary malignant tumour |
| Brain haemorrhage |
| Brain/intracranial abscess |
| Cerebral aneurysm |
| Cerebral palsy |
| Chronic/degenerative neurological problem |
| Dementia/Alzheimer's disease/cognitive impairment |
| Encephalitis |
| Epilepsy |
| Head injury |
| Infection of nervous system |
| Ischaemic stroke |
| Meningeal cancer/malignant meningioma |
| Meningioma (benign) |
| Meningitis |
| Motor neurone disease |
| Multiple sclerosis |
| Neurological injury/trauma |
| Neuroma (benign) |
| Other demyelinating condition |
| Other neurological problem |
| Parkinson's disease |
| Spina bifida |
| Stroke |
| Subarachnoid haemorrhage |
| Subdural haematoma |
| Transient ischaemic attack |
| Brain haemorrhage |

Table S2. Lifestyle factors source and definitions

| **Lifestyle factor** | **Source and definition** |
| --- | --- |
| Smoking status | UK Biobank Touchscreen questionnaire at MRI assessment. Smoking status defined as current, previous, never smoker |
| Alcohol drinking | UK Biobank Touchscreen questionnaire at MRI assessment. Alcohol drinking was calculated by alcohol intake frequency; average weekly red wine intake; average weekly champagne plus white wine intake; average weekly beer plus cider intake; average weekly spirits intake; average weekly fortified wine intake based on UK alcohol units guideline. |
| Diet | UK Biobank Touchscreen questionnaire at MRI assessment. Diet score was constructed by the unweighted sum of adherence to the UK dietary guideline of processed meat intake; beef intake; lamb intake; pork intake; oily fish; non-oily fish; mike type; spread; cereal; adding salt to food; fresh fruit; dried fruit; salad/raw vegetables; cooked vegetables; water. |
| Physical activity | UK Biobank Touchscreen questionnaire at MRI assessment. Physical activity was calculated by MET minutes per week for moderate activity; MET minutes per week for vigorous activity; MET minutes per week for walking |
| Sedentary behaviour | UK Biobank Touchscreen questionnaire at MRI assessment. Sedentary behaviour was calculated by summing the time spent for driving, time spent for PC, and time spent for television. |

Note: MRI, magnetic resonance imaging; MET, metabolic equivalents task units.

Table S3. Lifestyle factors intercorrelations

| **Standardised β** | **Smoking status** | **Alcohol drinking** | **Diet** | **Sedentary behaviour** | **Physical activity** |
| --- | --- | --- | --- | --- | --- |
| **Smoking status** | 1 |  |  |  |  |
| **Alcohol drinking** | 0.1865* | 1 |  |  |  |
| **Diet** | 0.0698* | 0.1461* | 1 |  |  |
| **Sedentary behaviour** | 0.0591* | 0.0699* | 0.1140* | 1 |  |
| **Physical activity** | 0.0139* | -0.0130* | 0.0922* | 0.0996* | 1 |

Note. Standardised βs reported. * indicates p<0.05

Table S4. Variables included in general factors

| **Description** | **Contents** |
| --- | --- |
| **Variables included in "gFrontal"** | |
|  | Volume of grey matter in Frontal Pole (left) |
|  | Volume of grey matter in Frontal Pole (right) |
|  | Volume of grey matter in Superior Frontal Gyrus (left) |
|  | Volume of grey matter in Superior Frontal Gyrus (right) |
|  | Volume of grey matter in Middle Frontal Gyrus (left) |
|  | Volume of grey matter in Middle Frontal Gyrus (right) |
|  | Volume of grey matter in Inferior Frontal Gyrus, pars triangularis (left) |
|  | Volume of grey matter in Inferior Frontal Gyrus, pars triangularis (right) |
|  | Volume of grey matter in Inferior Frontal Gyrus, pars opercularis (left) |
|  | Volume of grey matter in Inferior Frontal Gyrus, pars opercularis (right) |
|  | Volume of grey matter in Frontal Medial Cortex (left) |
|  | Volume of grey matter in Frontal Medial Cortex (right) |
|  | Volume of grey matter in Frontal Orbital Cortex (left) |
|  | Volume of grey matter in Frontal Orbital Cortex (right) |
|  | Volume of grey matter in Frontal Operculum Cortex (left) |
|  | Volume of grey matter in Frontal Operculum Cortex (right) |
| **Variables included in "gFA"** | |
|  | Weighted-mean FA in tract acoustic radiation (left) |
|  | Weighted-mean FA in tract acoustic radiation (right) |
|  | Weighted-mean FA in tract anterior thalamic radiation (left) |
|  | Weighted-mean FA in tract anterior thalamic radiation (right) |
|  | Weighted-mean FA in tract cingulate gyrus part of cingulum (left) |
|  | Weighted-mean FA in tract cingulate gyrus part of cingulum (right) |
|  | Weighted-mean FA in tract parahippocampal part of cingulum (left) |
|  | Weighted-mean FA in tract parahippocampal part of cingulum (right) |
|  | Weighted-mean FA in tract corticospinal tract (left) |
|  | Weighted-mean FA in tract corticospinal tract (right) |
|  | Weighted-mean FA in tract forceps major |
|  | Weighted-mean FA in tract forceps minor |
|  | Weighted-mean FA in tract inferior fronto-occipital fasciculus (left) |
|  | Weighted-mean FA in tract inferior fronto-occipital fasciculus (right) |
|  | Weighted-mean FA in tract inferior longitudinal fasciculus (left) |
|  | Weighted-mean FA in tract inferior longitudinal fasciculus (right) |
|  | Weighted-mean FA in tract middle cerebellar peduncle |
|  | Weighted-mean FA in tract medial lemniscus (left) |
|  | Weighted-mean FA in tract medial lemniscus (right) |
|  | Weighted-mean FA in tract posterior thalamic radiation (left) |
|  | Weighted-mean FA in tract posterior thalamic radiation (right) |
|  | Weighted-mean FA in tract superior longitudinal fasciculus (left) |
|  | Weighted-mean FA in tract superior longitudinal fasciculus (right) |
|  | Weighted-mean FA in tract superior thalamic radiation (left) |
|  | Weighted-mean FA in tract superior thalamic radiation (right) |
|  | Weighted-mean FA in tract uncinate fasciculus (left) |
|  | Weighted-mean FA in tract uncinate fasciculus (right) |
| **Variables included in "gMD"** | |
|  | Weighted-mean MD in tract acoustic radiation (left) |
|  | Weighted-mean MD in tract acoustic radiation (right) |
|  | Weighted-mean MD in tract anterior thalamic radiation (left) |
|  | Weighted-mean MD in tract anterior thalamic radiation (right) |
|  | Weighted-mean MD in tract cingulate gyrus part of cingulum (left) |
|  | Weighted-mean MD in tract cingulate gyrus part of cingulum (right) |
|  | Weighted-mean MD in tract parahippocampal part of cingulum (left) |
|  | Weighted-mean MD in tract parahippocampal part of cingulum (right) |
|  | Weighted-mean MD in tract corticospinal tract (left) |
|  | Weighted-mean MD in tract corticospinal tract (right) |
|  | Weighted-mean MD in tract forceps major |
|  | Weighted-mean MD in tract forceps minor |
|  | Weighted-mean MD in tract inferior fronto-occipital fasciculus (left) |
|  | Weighted-mean MD in tract inferior fronto-occipital fasciculus (right) |
|  | Weighted-mean MD in tract inferior longitudinal fasciculus (left) |
|  | Weighted-mean MD in tract inferior longitudinal fasciculus (right) |
|  | Weighted-mean MD in tract middle cerebellar peduncle |
|  | Weighted-mean MD in tract medial lemniscus (left) |
|  | Weighted-mean MD in tract medial lemniscus (right) |
|  | Weighted-mean MD in tract posterior thalamic radiation (left) |
|  | Weighted-mean MD in tract posterior thalamic radiation (right) |
|  | Weighted-mean MD in tract superior longitudinal fasciculus (left) |
|  | Weighted-mean MD in tract superior longitudinal fasciculus (right) |
|  | Weighted-mean MD in tract superior thalamic radiation (left) |
|  | Weighted-mean MD in tract superior thalamic radiation (right) |
|  | Weighted-mean MD in tract uncinate fasciculus (left) |
|  | Weighted-mean MD in tract uncinate fasciculus (right) |
| **Variables included in "gICVF"** | |
|  | Weighted-mean ICVF in tract acoustic radiation (left) |
|  | Weighted-mean ICVF in tract acoustic radiation (right) |
|  | Weighted-mean ICVF in tract anterior thalamic radiation (left) |
|  | Weighted-mean ICVF in tract anterior thalamic radiation (right) |
|  | Weighted-mean ICVF in tract cingulate gyrus part of cingulum (left) |
|  | Weighted-mean ICVF in tract cingulate gyrus part of cingulum (right) |
|  | Weighted-mean ICVF in tract parahippocampal part of cingulum (left) |
|  | Weighted-mean ICVF in tract parahippocampal part of cingulum (right) |
|  | Weighted-mean ICVF in tract corticospinal tract (left) |
|  | Weighted-mean ICVF in tract corticospinal tract (right) |
|  | Weighted-mean ICVF in tract forceps major |
|  | Weighted-mean ICVF in tract forceps minor |
|  | Weighted-mean ICVF in tract inferior fronto-occipital fasciculus (left) |
|  | Weighted-mean ICVF in tract inferior fronto-occipital fasciculus (right) |
|  | Weighted-mean ICVF in tract inferior longitudinal fasciculus (left) |
|  | Weighted-mean ICVF in tract inferior longitudinal fasciculus (right) |
|  | Weighted-mean ICVF in tract middle cerebellar peduncle |
|  | Weighted-mean ICVF in tract medial lemniscus (left) |
|  | Weighted-mean ICVF in tract medial lemniscus (right) |
|  | Weighted-mean ICVF in tract posterior thalamic radiation (left) |
|  | Weighted-mean ICVF in tract posterior thalamic radiation (right) |
|  | Weighted-mean ICVF in tract superior longitudinal fasciculus (left) |
|  | Weighted-mean ICVF in tract superior longitudinal fasciculus (right) |
|  | Weighted-mean ICVF in tract superior thalamic radiation (left) |
|  | Weighted-mean ICVF in tract superior thalamic radiation (right) |
|  | Weighted-mean ICVF in tract uncinate fasciculus (left) |
|  | Weighted-mean ICVF in tract uncinate fasciculus (right) |
| **Variables included in "gISOVF"** | |
|  | Weighted-mean ISOVF in tract acoustic radiation (left) |
|  | Weighted-mean ISOVF in tract acoustic radiation (right) |
|  | Weighted-mean ISOVF in tract anterior thalamic radiation (left) |
|  | Weighted-mean ISOVF in tract anterior thalamic radiation (right) |
|  | Weighted-mean ISOVF in tract cingulate gyrus part of cingulum (left) |
|  | Weighted-mean ISOVF in tract cingulate gyrus part of cingulum (right) |
|  | Weighted-mean ISOVF in tract parahippocampal part of cingulum (left) |
|  | Weighted-mean ISOVF in tract parahippocampal part of cingulum (right) |
|  | Weighted-mean ISOVF in tract corticospinal tract (left) |
|  | Weighted-mean ISOVF in tract corticospinal tract (right) |
|  | Weighted-mean ISOVF in tract forceps major |
|  | Weighted-mean ISOVF in tract forceps minor |
|  | Weighted-mean ISOVF in tract inferior fronto-occipital fasciculus (left) |
|  | Weighted-mean ISOVF in tract inferior fronto-occipital fasciculus (right) |
|  | Weighted-mean ISOVF in tract inferior longitudinal fasciculus (left) |
|  | Weighted-mean ISOVF in tract inferior longitudinal fasciculus (right) |
|  | Weighted-mean ISOVF in tract middle cerebellar peduncle |
|  | Weighted-mean ISOVF in tract medial lemniscus (left) |
|  | Weighted-mean ISOVF in tract medial lemniscus (right) |
|  | Weighted-mean ISOVF in tract posterior thalamic radiation (left) |
|  | Weighted-mean ISOVF in tract posterior thalamic radiation (right) |
|  | Weighted-mean ISOVF in tract superior longitudinal fasciculus (left) |
|  | Weighted-mean ISOVF in tract superior longitudinal fasciculus (right) |
|  | Weighted-mean ISOVF in tract superior thalamic radiation (left) |
|  | Weighted-mean ISOVF in tract superior thalamic radiation (right) |
|  | Weighted-mean ISOVF in tract uncinate fasciculus (left) |
|  | Weighted-mean ISOVF in tract uncinate fasciculus (right) |
| **Variables included in "gOD"** | |
|  | Weighted-mean OD in tract acoustic radiation (left) |
|  | Weighted-mean OD in tract acoustic radiation (right) |
|  | Weighted-mean OD in tract anterior thalamic radiation (left) |
|  | Weighted-mean OD in tract anterior thalamic radiation (right) |
|  | Weighted-mean OD in tract cingulate gyrus part of cingulum (left) |
|  | Weighted-mean OD in tract cingulate gyrus part of cingulum (right) |
|  | Weighted-mean OD in tract parahippocampal part of cingulum (left) |
|  | Weighted-mean OD in tract parahippocampal part of cingulum (right) |
|  | Weighted-mean OD in tract corticospinal tract (left) |
|  | Weighted-mean OD in tract corticospinal tract (right) |
|  | Weighted-mean OD in tract forceps major |
|  | Weighted-mean OD in tract forceps minor |
|  | Weighted-mean OD in tract inferior fronto-occipital fasciculus (left) |
|  | Weighted-mean OD in tract inferior fronto-occipital fasciculus (right) |
|  | Weighted-mean OD in tract inferior longitudinal fasciculus (left) |
|  | Weighted-mean OD in tract inferior longitudinal fasciculus (right) |
|  | Weighted-mean OD in tract middle cerebellar peduncle |
|  | Weighted-mean OD in tract medial lemniscus (left) |
|  | Weighted-mean OD in tract medial lemniscus (right) |
|  | Weighted-mean OD in tract posterior thalamic radiation (left) |
|  | Weighted-mean OD in tract posterior thalamic radiation (right) |
|  | Weighted-mean OD in tract superior longitudinal fasciculus (left) |
|  | Weighted-mean OD in tract superior longitudinal fasciculus (right) |
|  | Weighted-mean OD in tract superior thalamic radiation (left) |
|  | Weighted-mean OD in tract superior thalamic radiation (right) |
|  | Weighted-mean OD in tract uncinate fasciculus (left) |
|  | Weighted-mean OD in tract uncinate fasciculus (right) |

Note: gFA, general factors of fractional anisotropy; gMD, general factors of mean diffusivity; gICVF, general factors of intracellular volume fraction; gISOVF, general factors of isotropic volume fraction; gOD, general factors of orientation dispersion.

Table S5. Associations between individual lifestyle factor and brain structural phenotypes

| β (95% CI) | Smoking status | | Alcohol drinking | | Diet | | Sedentary behaviour | | Physical activity | | APOE e4 |
| --- | --- | --- | --- | --- | --- | --- | --- | --- | --- | --- | --- |
| Brain structural phenotypes | Current | Former | High | Moderate | Unhealthy | Moderate | High | Medium | Low | Medium | Presence |
| GM | **-0.071**  **(-0.095, -0.048)** | **-0.035**  **(-0.043, -0.026)** | **-0.099**  **(-0.118, -0.080)** | **-0.026**  **(-0.035, -0.016)** | -0.004  (-0.019, 0.012) | -0.001  (-0.014, 0.012) | **0.020**  **(0.009, 0.031)** | **0.017**  **(0.007, 0.026)** | 0.008  (-0.002, 0.018) | 0.003  (-0.007, 0.012) | -0.001  (-0.010, 0.008) |
| WM | **0.040**  **(0.018, 0.061)** | **0.015**  **(0.007, 0.023)** | **0.032**  **(0.015, 0.049)** | 0.010  (0.001, 0.018) | 0.001  (-0.013, 0.015) | 0.002  (-0.010, 0.013) | -0.010  (-0.020, 0.000) | -0.006  (-0.014, 0.003) | -0.010  (-0.019, -0.001) | 0.001  (-0.008, 0.010) | -0.002  (-0.010, 0.006) |
| TBV | **-0.014**  **(-0.023, -0.004)** | **-0.009**  **(-0.012, -0.005)** | **-0.032**  **(-0.039, -0.024)** | **-0.007**  **(-0.011, -0.004)** | -0.001  (-0.007, 0.005) | 0.001  (-0.004, 0.006) | 0.004  (0.000, 0.009) | **0.005**  **(0.001, 0.009)** | -0.001  (-0.005, 0.002) | 0.002  (-0.002, 0.006) | -0.002  (-0.005, 0.002) |
| LH | **-0.117**  **(-0.182, -0.052)** | **-0.026**  **(-0.050, -0.003)** | -0.058  (-0.110, -0.006) | -0.005  (-0.030, 0.019) | -0.011  (-0.053, 0.031) | 0.010  (-0.025, 0.045) | -0.040  (-0.070, -0.010) | -0.034  (-0.061, -0.008) | -0.011  (-0.038, 0.017) | -0.002  (-0.029, 0.025) | **-0.042**  **(-0.067, -0.016)** |
| RH | **-0.085**  **(-0.150, -0.021)** | -0.027  (-0.050, -0.003) | -0.058  (-0.109, -0.006) | -0.022  (-0.046, 0.003) | -0.017  (-0.058, 0.025) | 0.000  (-0.035, 0.034) | **-0.014**  **(-0.043, 0.016)** | **-0.005**  **(-0.030, 0.021)** | -0.021  (-0.049, 0.006) | 0.010  (-0.017, 0.037) | **-0.045**  **(-0.070, -0.020)** |
| WMHV | **0.209**  **(0.148, 0.270)** | **0.049**  **(0.027, 0.072)** | **0.133**  **(0.085, 0.182)** | 0.023  (0.000, 0.046) | **0.061**  **(0.022, 0.099)** | 0.024  (-0.009, 0.056) | **0.041**  **(0.013, 0.069)** | 0.011  (-0.013, 0.035) | **-0.031**  **(-0.057, -0.006)** | -0.023  (-0.048, 0.002) | **0.034**  **(0.011, 0.058)** |
| THV | **-0.111**  **(-0.174, -0.048)** | **-0.029**  **(-0.052, -0.006)** | -0.064  (-0.114, -0.014) | -0.015  (-0.039, 0.009) | -0.015  (-0.055, 0.025) | 0.006  (-0.028, 0.039) | -0.029  (-0.058, -0.001) | -0.021  (-0.046, 0.004) | -0.018  (-0.044, 0.009) | 0.005  (-0.022, 0.031) | **-0.048**  **(-0.072, -0.023)** |
| HD | -0.033  (-0.106, 0.040) | 0.001  (-0.025, 0.028) | 0.002  (-0.056, 0.060) | 0.020  (-0.008, 0.048) | 0.007  (-0.039, 0.054) | 0.013  (-0.027, 0.052) | -0.030  (-0.063, 0.004) | -0.035  (-0.064, -0.005) | 0.013  (-0.018, 0.044) | -0.014  (-0.045, 0.016) | 0.005  (-0.023, 0.034) |
| gFrontal | **-0.081**  **(-0.124, -0.039)** | **-0.044**  **(-0.059, -0.028)** | **-0.104**  **(-0.138, -0.071)** | **-0.030**  **(-0.046, -0.014)** | 0.005  (-0.022, 0.032) | 0.000  (-0.022, 0.023) | **0.031**  **(0.012, 0.051)** | **0.021**  **(0.004, 0.038)** | **0.039**  **(0.021, 0.057)** | 0.011  (-0.007, 0.028) | -0.009  (-0.026, 0.007) |
| gICVF | -0.069  (-0.140, 0.001) | **-0.034**  **(-0.060, -0.008)** | **-0.105**  **(-0.161, -0.049)** | -0.014  (-0.041, 0.013) | 0.062  (0.017, 0.107) | 0.036  (-0.002, 0.074) | 0.026  (-0.006, 0.058) | 0.017  (-0.011, 0.045) | 0.009  (-0.021, 0.039) | 0.021  (-0.008, 0.051) | -0.026  (-0.053, 0.002) |
| gISOVF | 0.090  (0.022, 0.158) | -0.007  (-0.031, 0.018) | **0.092**  **(0.038, 0.146)** | -0.004  (-0.030, 0.021) | **0.079**  **(0.036, 0.123)** | 0.037  (0.001, 0.074) | **-0.051**  **(-0.082, -0.020)** | -0.025  (-0.052, 0.003) | -0.015  (-0.044, 0.014) | -0.018  (-0.046, 0.010) | **0.032**  **(0.006, 0.059)** |
| gOD | 0.025  (-0.044, 0.094) | -0.019  (-0.044, 0.006) | **-0.080**  **(-0.134, -0.025)** | -0.013  (-0.039, 0.013) | **0.065**  **(0.021, 0.108)** | 0.013  (-0.024, 0.050) | **0.062**  **(0.031, 0.094)** | **0.049**  **(0.021, 0.076)** | -0.033  (-0.062, -0.004) | -0.031  (-0.059, -0.002) | -0.028  (-0.054, -0.001) |
| gFA | **-0.104**  **(-0.174, -0.035)** | -0.013  (-0.038, 0.013) | **-0.082**  **(-0.138, -0.027)** | 0.007  (-0.019, 0.034) | 0.018  (-0.027, 0.062) | 0.036  (-0.001, 0.074) | 0.004  (-0.028, 0.036) | -0.010  (-0.038, 0.018) | **0.036**  **(0.007, 0.065)** | **0.043**  **(0.014, 0.072)** | -0.028  (-0.055, -0.001) |
| gMD | **0.094**  **(0.027, 0.160)** | 0.022  (-0.002, 0.046) | **0.152**  **(0.100, 0.204)** | 0.023  (-0.002, 0.048) | 0.035  (-0.007, 0.077) | 0.015  (-0.021, 0.050) | **-0.039**  **(-0.069, -0.009)** | **-0.036**  **(-0.062, -0.009)** | -0.011  (-0.039, 0.017) | -0.019  (-0.046, 0.009) | **0.040**  **(0.014, 0.065)** |

Note: Standardised betas (β) and 95% confidence intervals are reported from regression models where each risk factors are individually regressed onto brain phenotypes in the fully adjusted models with the healthiest level as reference, such as, never smoking, moderate risk of drinking, healthy diet, low duration sedentariness, high level physical activity, absence of APOE e4. Betas reflect increases per SD of the dependent variable, per increase in the independent variable. Bold type indicates FDR significant (q < 0.05). CI, confidence interval; APOE, apolipoprotein E; GM, grey matter volume; WM, white matter volume; TBV, total brain volume; LH, left hippocampal volume; RH, right hippocampal volume; WMHV, white matter hyperintensities volume; THV, total hippocampus volume; HD, hippocampus volume differences (left minus right); gFA, general factors of fractional anisotropy; gMD, general factors of mean diffusivity; gICVF, general factors of intracellular volume fraction; gISOVF, general factors of isotropic volume fraction; gOD, general factors of orientation dispersion.

| β (95% CI) | Smoking status | | Alcohol drinking | | Diet | | Sedentary behaviour | | Physical activity | | APOE e4 |
| --- | --- | --- | --- | --- | --- | --- | --- | --- | --- | --- | --- |
| Brain structural phenotypes | Current | Former | High | Moderate | Unhealthy | Moderate | High | Medium | Low | Medium | Presence |
| GM | **-0.063**  **(-0.087, -0.040)** | **-0.029**  **(-0.037, -0.020)** | **-0.090**  **(-0.109, -0.071)** | **-0.021**  **(-0.030, -0.012)** | 0.004  (-0.012, 0.019) | 0.001  (-0.012, 0.014) | **0.022**  **(0.011, 0.033)** | **0.018**  **(0.008, 0.027)** | 0.006  (-0.004, 0.016) | 0.001  (-0.009, 0.011) | 0.000  (-0.009, 0.009) |
| WM | **0.038**  **(0.016, 0.059)** | **0.013**  **(0.005, 0.021)** | **0.027**  **(0.010, 0.045)** | 0.007  (-0.001, 0.015) | -0.001  (-0.015, 0.013) | 0.001  (-0.010, 0.013) | -0.010  (-0.020, 0.000) | -0.006  (-0.015, 0.003) | -0.009  (-0.018, 0.000) | 0.002  (-0.007, 0.011) | -0.003  (-0.011, 0.006) |
| TBV | -0.011  (-0.020, -0.001) | **-0.007**  **(-0.010, -0.003)** | **-0.030**  **(-0.037, -0.022)** | **-0.007**  **(-0.010, -0.003)** | 0.001  (-0.005, 0.007) | 0.001  (-0.004, 0.006) | **0.005**  **(0.001, 0.010)** | **0.006**  **(0.002, 0.009)** | -0.002  (-0.006, 0.002) | 0.001  (-0.002, 0.005) | -0.002  (-0.005, 0.002) |
| LH | **-0.111**  **(-0.176, -0.045)** | -0.023  (-0.047, 0.001) | -0.045  (-0.097, 0.008) | 0.000  (-0.025, 0.025) | 0.001  (-0.041, 0.043) | 0.015  (-0.020, 0.050) | **-0.037**  **(-0.067, -0.007)** | **-0.034**  **(-0.060, -0.007)** | -0.008  (-0.035, 0.020) | -0.002  (-0.029, 0.025) | **-0.041**  **(-0.066, -0.016)** |
| RH | -0.077  (-0.142, -0.012) | -0.022  (-0.046, 0.002) | -0.047  (-0.099, 0.005) | -0.018  (-0.043, 0.007) | -0.005  (-0.047, 0.037) | 0.004  (-0.031, 0.039) | -0.009  (-0.039, 0.020) | -0.003  (-0.029, 0.023) | -0.021  (-0.048, 0.007) | 0.010  (-0.017, 0.036) | **-0.044**  **(-0.069, -0.020)** |
| WMHV | **0.194**  **(0.133, 0.255)** | **0.041**  **(0.019, 0.064)** | **0.107**  **(0.058, 0.155)** | 0.011  (-0.012, 0.035) | 0.045  (0.006, 0.085) | 0.019  (-0.014, 0.052) | **0.037**  **(0.009, 0.065)** | 0.009  (-0.015, 0.033) | **-0.036**  **(-0.062, -0.010)** | -0.023  (-0.048, 0.003) | **0.033**  **(0.009, 0.056)** |
| THV | **-0.103**  **(0.167, -0.040)** | -0.025  (-0.048, -0.002) | -0.051  (-0.101, 0.000) | -0.010  (-0.034, 0.014) | -0.002  (-0.043, 0.038) | 0.010  (-0.024, 0.044) | -0.025  (-0.054, 0.004) | -0.020  (-0.045, 0.005) | -0.016  (-0.043, 0.011) | 0.004  (-0.022, 0.030) | **-0.047**  **(-0.072, -0.023)** |
| HD | -0.036  (-0.110, 0.038) | -0.001  (-0.028, 0.026) | 0.005  (-0.054, 0.064) | 0.022  (-0.007, 0.050) | 0.007  (-0.040, 0.054) | 0.012  (-0.027, 0.052) | -0.032  (-0.065, 0.002) | -0.036  (-0.065, -0.006) | 0.016  (-0.015, 0.047) | -0.014  (-0.044, 0.017) | 0.006  (-0.023, 0.034) |
| gFrontal | **-0.075**  **(-0.117, -0.032)** | **-0.038**  **(-0.053, -0.022)** | **-0.093**  **(-0.127, -0.060)** | **-0.024**  **(-0.041, -0.008)** | 0.009  (-0.018, 0.036) | 0.001  (-0.022, 0.023) | **0.031**  **(0.011, 0.050)** | **0.022**  **(0.005, 0.039)** | **0.036**  **(0.018, 0.054)** | 0.009  (-0.009, 0.026) | -0.008  (-0.024, 0.009) |
| gICVF | -0.067  (-0.138, 0.004) | -0.030  (-0.056, -0.004) | **-0.103**  **(-0.159, -0.046)** | -0.013  (-0.040, 0.015) | **0.070**  **(0.025, 0.116)** | 0.038  (0.000, 0.075) | 0.025  (-0.007, 0.057) | 0.017  (-0.012, 0.045) | 0.003  (-0.026, 0.033) | 0.019  (-0.011, 0.048) | -0.025  (-0.052, 0.003) |
| gISOVF | 0.079  (0.011, 0.148) | -0.010  (-0.036, 0.015) | **0.084**  **(0.029, 0.138)** | -0.007  (-0.034, 0.019) | 0.081  (0.037, 0.125) | 0.040  (0.003, 0.076) | -0.056  (-0.087, -0.025) | -0.026  (-0.054, 0.001) | -0.015  (-0.044, 0.014) | -0.017  (-0.045, 0.011) | **0.032**  **(0.006, 0.059)** |
| gOD | 0.024  (-0.045, 0.093) | -0.016  (-0.041, 0.009) | **-0.091**  **(-0.146, -0.035)** | -0.016  (-0.043, 0.010) | **0.068**  **(0.024, 0.112)** | 0.013  (-0.024, 0.050) | **0.063**  **(0.031, 0.094)** | **0.049**  **(0.021, 0.076)** | **-0.041**  **(-0.070, -0.012)** | -0.033  (-0.062, -0.005) | -0.027  (-0.054, -0.001) |
| gFA | **-0.100**  **(-0.170, -0.030)** | -0.010  (-0.036, 0.016) | **-0.074**  **(-0.130, -0.018)** | 0.011  (-0.016, 0.037) | 0.021  (-0.024, 0.066) | 0.036  (-0.002, 0.073) | 0.003  (-0.029, 0.035) | -0.011  (-0.039, 0.017) | 0.035  (0.006, 0.065) | **0.041**  **(0.012, 0.071)** | -0.027  (-0.054, 0.000) |
| gMD | 0.079  (0.013, 0.145) | 0.013  (-0.011, 0.038) | **0.143**  **(0.090, 0.196)** | 0.019  (-0.006, 0.045) | 0.027  (-0.015, 0.070) | 0.014  (-0.022, 0.049) | **-0.044**  **(-0.074, -0.013)** | **-0.038**  **(-0.064, -0.011)** | -0.009  (-0.037, 0.019) | -0.016  (-0.044, 0.011) | **0.040**  **(0.014, 0.065)** |

Table S6. Associations between simultaneous lifestyle factors and brain structural phenotypes

Note: Standardised betas (β) and 95% confidence intervals are reported from regression models where each risk factors are simultaneous regressed onto brain phenotypes in the fully adjusted models with the healthiest level as reference, such as, no smoking, moderate risk of drinking, healthy diet, low duration sedentariness, high level physical activity, absence of APOE e4. Betas reflect increases per SD of the dependent variable, per increase in the independent variable. Bold type indicates FDR significant (q < 0.05). CI, confidence interval; APOE, apolipoprotein E; GM, grey matter volume; WM, white matter volume; TBV, total brain volume; LH, left hippocampal volume; RH, right hippocampal volume; WMHV, white matter hyperintensities volume; THV, total hippocampus volume; HD, hippocampus volume differences (left minus right); gFA, general factors of fractional anisotropy; gMD, general factors of mean diffusivity; gICVF, general factors of intracellular volume fraction; gISOVF, general factors of isotropic volume fraction; gOD, general factors of orientation dispersion.

Table S7. Individual two-way interactions between APOE e4 genotype and lifestyle levels, on brain structural phenotypes

|  |  | **95% CI** | |  |
| --- | --- | --- | --- | --- |
|  | **β** | **Lower** | **Upper** | **P values** |
| **Grey matter** |  |  |  |  |
| Present × Unfavourable | -0.005 | -0.044 | 0.034 | 0.798 |
| Present × Moderate | 0.008 | -0.011 | 0.027 | 0.413 |
| **White matter** |  |  |  |  |
| Present × Unfavourable | -0.002 | -0.037 | 0.033 | 0.926 |
| Present × Moderate | -0.007 | -0.024 | 0.010 | 0.423 |
| **Total brain volume** |  |  |  |  |
| Present × Unfavourable | -0.003 | -0.019 | 0.012 | 0.655 |
| Present × Moderate | 0.000 | -0.007 | 0.007 | 0.982 |
| **Left hippocampus** |  |  |  |  |
| Present × Unfavourable | 0.048 | -0.059 | 0.154 | 0.379 |
| Present × Moderate | -0.002 | -0.054 | 0.051 | 0.951 |
| **Right hippocampus** |  |  |  |  |
| Present × Unfavourable | 0.005 | -0.100 | 0.111 | 0.921 |
| Present × Moderate | 0.024 | -0.028 | 0.076 | 0.363 |
| **White matter hyperintensity** |  |  |  |  |
| Present × Unfavourable | 0.002 | -0.098 | 0.101 | 0.973 |
| Present × Moderate | 0.016 | -0.033 | 0.064 | 0.520 |
| **Total hippocampus volume** |  |  |  |  |
| Present × Unfavourable | 0.029 | -0.074 | 0.132 | 0.581 |
| Present × Moderate | 0.013 | -0.038 | 0.063 | 0.625 |
| **Hippocampus differences** |  |  |  |  |
| Present × Unfavourable | 0.049 | -0.070 | 0.169 | 0.420 |
| Present × Moderate | -0.031 | -0.089 | 0.028 | 0.304 |
| **gFrontal** |  |  |  |  |
| Present × Unfavourable | -0.001 | -0.070 | 0.068 | 0.984 |
| Present × Moderate | -0.003 | -0.037 | 0.031 | 0.850 |
| **gICVF** |  |  |  |  |
| Present × Unfavourable | -0.025 | -0.140 | 0.091 | 0.676 |
| Present × Moderate | 0.042 | -0.015 | 0.098 | 0.147 |
| **gISOVF** |  |  |  |  |
| Present × Unfavourable | 0.054 | -0.057 | 0.166 | 0.337 |
| Present × Moderate | 0.043 | -0.011 | 0.098 | 0.119 |
| **gOD** |  |  |  |  |
| Present × Unfavourable | -0.038 | -0.150 | 0.075 | 0.510 |
| Present × Moderate | 0.018 | -0.037 | 0.073 | 0.519 |
| **gFA** |  |  |  |  |
| Present × Unfavourable | 0.001 | -0.113 | 0.115 | 0.983 |
| Present × Moderate | 0.031 | -0.025 | 0.087 | 0.277 |
| **gMD** |  |  |  |  |
| Present × Unfavourable | 0.036 | -0.072 | 0.144 | 0.509 |
| Present × Moderate | -0.006 | -0.058 | 0.047 | 0.836 |

Note: Standardised betas (β) and 95% confidence intervals are reported in fully adjusted models. Bold type P values indicate FDR significant (q < 0.05). gFA, general factors of fractional anisotropy; gMD, general factors of mean diffusivity; gICVF, general factors of intracellular volume fraction; gISOVF, general factors of isotropic volume fraction; gOD, general factors of orientation dispersion.

Table S8. Individual two-way interactions between APOE e4 genotype and each lifestyle factor, on brain structural phenotypes

|  |  |  | 95% CI | |  |
| --- | --- | --- | --- | --- | --- |
|  |  | β | Lower | Upper | P |
| **Smoke × APOE e4** |  |  |  |  |  |
| Grey matter volume | Present × Current smoker | 0.015 | -0.038 | 0.067 | 0.579 |
|  | Present × Former smoker | -0.014 | -0.034 | 0.005 | 0.146 |
| White matter volume | Present × Current smoker | -0.016 | -0.063 | 0.031 | 0.503 |
|  | Present × Former smoker | 0.000 | -0.018 | 0.017 | 0.982 |
| Total brain volume | Present × Current smoker | -0.002 | -0.022 | 0.019 | 0.882 |
|  | Present × Former smoker | -0.007 | -0.015 | 0.000 | 0.058 |
| Left hippocampus | Present × Current smoker | -0.136 | -0.279 | 0.007 | 0.063 |
|  | Present × Former smoker | -0.035 | -0.088 | 0.019 | 0.201 |
| Right hippocampus | Present × Current smoker | -0.114 | -0.256 | 0.028 | 0.116 |
|  | Present × Former smoker | -0.034 | -0.087 | 0.019 | 0.206 |
| White matter hyperintensity | Present × Current smoker | 0.107 | -0.026 | 0.240 | 0.116 |
|  | Present × Former smoker | 0.037 | -0.012 | 0.087 | 0.140 |
| Total hippocampus volume | Present × Current smoker | -0.138 | -0.276 | 0.001 | 0.051 |
|  | Present × Former smoker | -0.038 | -0.089 | 0.013 | 0.148 |
| Hippocampus differences | Present × Current smoker | -0.021 | -0.182 | 0.139 | 0.794 |
|  | Present × Former smoker | 0.001 | -0.059 | 0.060 | 0.986 |
| gFrontal | Present × Current smoker | -0.001 | -0.094 | 0.092 | 0.983 |
|  | Present × Former smoker | -0.004 | -0.039 | 0.030 | 0.816 |
| gICVF | Present × Current smoker | 0.098 | -0.057 | 0.252 | 0.216 |
|  | Present × Former smoker | -0.025 | -0.083 | 0.032 | 0.391 |
| gISOVF | Present × Current smoker | -0.018 | -0.168 | 0.131 | 0.812 |
|  | Present × Former smoker | 0.006 | -0.049 | 0.062 | 0.820 |
| gOD | Present × Current smoker | 0.006 | -0.145 | 0.157 | 0.941 |
|  | Present × Former smoker | 0.003 | -0.054 | 0.059 | 0.926 |
| gFA | Present × Current smoker | 0.098 | -0.055 | 0.251 | 0.209 |
|  | Present × Former smoker | -0.026 | -0.083 | 0.031 | 0.371 |
| gMD | Present × Current smoker | -0.067 | -0.211 | 0.078 | 0.367 |
|  | Present × Former smoker | 0.052 | -0.002 | 0.106 | 0.058 |
| **Alcohol drinking × APOE4** |  |  |  |  |  |
| Grey matter | Present × High risk | 0.008 | -0.034 | 0.051 | 0.699 |
|  | Present × Moderate risk | -0.004 | -0.023 | 0.016 | 0.716 |
| White matter | Present × High risk | 0.006 | -0.032 | 0.045 | 0.752 |
|  | Present × Moderate risk | 0.010 | -0.008 | 0.027 | 0.275 |
| Total brain volume | Present × High risk | 0.008 | -0.009 | 0.024 | 0.367 |
|  | Present × Moderate risk | 0.004 | -0.004 | 0.011 | 0.349 |
| Left hippocampus | Present × High risk | 0.151 | 0.033 | 0.268 | **0.012** |
|  | Present × Moderate risk | 0.036 | -0.017 | 0.090 | 0.181 |
| Right hippocampus | Present × High risk | 0.119 | 0.003 | 0.235 | 0.045 |
|  | Present × Moderate risk | 0.028 | -0.025 | 0.081 | 0.305 |
| White matter hyperintensity | Present × High risk | -0.008 | -0.117 | 0.102 | 0.889 |
|  | Present × Moderate risk | 0.037 | -0.013 | 0.087 | 0.144 |
| Total hippocampus volume | Present × High risk | 0.148 | 0.035 | 0.262 | **0.010** |
|  | Present × Moderate risk | 0.035 | -0.016 | 0.087 | 0.180 |
| Hippocampus differences | Present × High risk | 0.032 | -0.100 | 0.164 | 0.631 |
|  | Present × Moderate risk | 0.009 | -0.051 | 0.069 | 0.766 |
| gFrontal | Present × High risk | 0.073 | -0.003 | 0.149 | 0.061 |
|  | Present × Moderate risk | -0.003 | -0.038 | 0.032 | 0.861 |
| gICVF | Present × High risk | -0.016 | -0.143 | 0.111 | 0.802 |
|  | Present × Moderate risk | 0.012 | -0.046 | 0.070 | 0.687 |
| gISOVF | Present × High risk | 0.026 | -0.096 | 0.148 | 0.677 |
|  | Present × Moderate risk | -0.009 | -0.065 | 0.047 | 0.752 |
| gOD | Present × High risk | 0.081 | -0.043 | 0.204 | 0.201 |
|  | Present × Moderate risk | -0.056 | -0.113 | 0.000 | 0.050 |
| gFA | Present × High risk | -0.039 | -0.164 | 0.087 | 0.546 |
|  | Present × Moderate risk | 0.042 | -0.016 | 0.099 | 0.155 |
| gMD | Present × High risk | 0.029 | -0.090 | 0.147 | 0.636 |
|  | Present × Moderate risk | -0.004 | -0.058 | 0.050 | 0.886 |
| **Diet × APOE e4** |  |  |  |  |  |
| Grey matter | Present × Unhealthy diet | 0.027 | -0.007 | 0.061 | 0.119 |
|  | Present × Moderate diet | 0.023 | -0.006 | 0.051 | 0.120 |
| White matter | Present × Unhealthy diet | -0.020 | -0.051 | 0.010 | 0.194 |
|  | Present × Moderate diet | -0.023 | -0.049 | 0.003 | 0.079 |
| Total brain volume | Present × Unhealthy diet | 0.002 | -0.011 | 0.015 | 0.740 |
|  | Present × Moderate diet | -0.001 | -0.013 | 0.010 | 0.795 |
| Left hippocampus | Present × Unhealthy diet | -0.011 | -0.104 | 0.081 | 0.811 |
|  | Present × Moderate diet | -0.034 | -0.112 | 0.045 | 0.398 |
| Right hippocampus | Present × Unhealthy diet | 0.013 | -0.078 | 0.105 | 0.774 |
|  | Present × Moderate diet | -0.015 | -0.092 | 0.063 | 0.706 |
| White matter hyperintensity | Present × Unhealthy diet | -0.045 | -0.131 | 0.041 | 0.307 |
|  | Present × Moderate diet | -0.025 | -0.098 | 0.048 | 0.496 |
| Total hippocampus volume | Present × Unhealthy diet | 0.001 | -0.088 | 0.091 | 0.975 |
|  | Present × Moderate diet | -0.027 | -0.102 | 0.049 | 0.489 |
| Hippocampus differences | Present × Unhealthy diet | -0.029 | -0.133 | 0.074 | 0.580 |
|  | Present × Moderate diet | -0.021 | -0.109 | 0.067 | 0.635 |
| gFrontal | Present × Unhealthy diet | 0.031 | -0.029 | 0.091 | 0.316 |
|  | Present × Moderate diet | 0.036 | -0.014 | 0.087 | 0.161 |
| gICVF | Present × Unhealthy diet | -0.026 | -0.126 | 0.074 | 0.611 |
|  | Present × Moderate diet | -0.001 | -0.086 | 0.083 | 0.973 |
| gISOVF | Present × Unhealthy diet | 0.018 | -0.079 | 0.114 | 0.719 |
|  | Present × Moderate diet | 0.002 | -0.080 | 0.083 | 0.968 |
| gOD | Present × Unhealthy diet | 0.014 | -0.083 | 0.111 | 0.777 |
|  | Present × Moderate diet | 0.040 | -0.043 | 0.122 | 0.347 |
| gFA | Present × Unhealthy diet | -0.010 | -0.109 | 0.089 | 0.844 |
|  | Present × Moderate diet | -0.017 | -0.101 | 0.067 | 0.688 |
| gMD | Present × Unhealthy diet | 0.021 | -0.073 | 0.114 | 0.665 |
|  | Present × Moderate diet | 0.027 | -0.052 | 0.106 | 0.498 |
| **Sedentary behaviour × APOE e4** | |  |  |  |  |
| Grey matter | Present × High duration | -0.004 | -0.028 | 0.019 | 0.718 |
|  | Present × Medium duration | -0.010 | -0.031 | 0.012 | 0.382 |
| White matter | Present × High duration | 0.005 | -0.017 | 0.026 | 0.673 |
|  | Present × Medium duration | 0.007 | -0.012 | 0.026 | 0.456 |
| Total brain volume | Present × High duration | 0.000 | -0.009 | 0.010 | 0.937 |
|  | Present × Medium duration | -0.001 | -0.009 | 0.008 | 0.869 |
| Left hippocampus | Present × High duration | 0.045 | -0.020 | 0.110 | 0.175 |
|  | Present × Medium duration | -0.009 | -0.067 | 0.050 | 0.775 |
| Right hippocampus | Present × High duration | 0.051 | -0.014 | 0.115 | 0.123 |
|  | Present × Medium duration | -0.033 | -0.091 | 0.025 | 0.264 |
| White matter hyperintensity | Present × High duration | 0.017 | -0.044 | 0.077 | 0.592 |
|  | Present × Medium duration | 0.061 | 0.007 | 0.116 | **0.027** |
| Total hippocampus volume | Present × High duration | 0.053 | -0.010 | 0.116 | 0.099 |
|  | Present × Medium duration | -0.023 | -0.079 | 0.033 | 0.422 |
| Hippocampus differences | Present × High duration | -0.009 | -0.082 | 0.064 | 0.816 |
|  | Present × Medium duration | 0.030 | -0.036 | 0.095 | 0.374 |
| gFrontal | Present × High duration | -0.022 | -0.065 | 0.020 | 0.299 |
|  | Present × Medium duration | -0.012 | -0.049 | 0.026 | 0.544 |
| gICVF | Present × High duration | 0.019 | -0.051 | 0.090 | 0.594 |
|  | Present × Medium duration | -0.033 | -0.096 | 0.030 | 0.303 |
| gISOVF | Present × High duration | 0.046 | -0.022 | 0.114 | 0.185 |
|  | Present × Medium duration | -0.011 | -0.071 | 0.050 | 0.729 |
| gOD | Present × High duration | 0.011 | -0.058 | 0.079 | 0.764 |
|  | Present × Medium duration | 0.022 | -0.039 | 0.084 | 0.473 |
| gFA | Present × High duration | -0.002 | -0.072 | 0.068 | 0.950 |
|  | Present × Medium duration | -0.039 | -0.101 | 0.024 | 0.226 |
| gMD | Present × High duration | -0.003 | -0.069 | 0.063 | 0.922 |
|  | Present × Medium duration | -0.001 | -0.060 | 0.058 | 0.971 |
| **Physical activity × APOE e4** |  |  |  |  |  |
| Grey matter | Present × Low level | -0.008 | -0.031 | 0.015 | 0.481 |
|  | Present × Medium level | -0.005 | -0.027 | 0.017 | 0.666 |
| White matter | Present × Low level | 0.007 | -0.013 | 0.028 | 0.490 |
|  | Present × Medium level | -0.006 | -0.026 | 0.014 | 0.537 |
| Total brain volume | Present × Low level | 0.000 | -0.009 | 0.009 | 0.986 |
|  | Present × Medium level | -0.006 | -0.015 | 0.003 | 0.178 |
| Left hippocampus | Present × Low level | -0.013 | -0.075 | 0.049 | 0.680 |
|  | Present × Medium level | -0.005 | -0.066 | 0.057 | 0.879 |
| Right hippocampus | Present × Low level | 0.004 | -0.057 | 0.065 | 0.896 |
|  | Present × Medium level | -0.042 | -0.103 | 0.018 | 0.172 |
| White matter hyperintensity | Present × Low level | -0.016 | -0.074 | 0.041 | 0.582 |
|  | Present × Medium level | 0.011 | -0.046 | 0.068 | 0.697 |
| Total hippocampus volume | Present × Low level | -0.005 | -0.065 | 0.055 | 0.876 |
|  | Present × Medium level | -0.026 | -0.085 | 0.033 | 0.384 |
| Hippocampus differences | Present × Low level | -0.020 | -0.089 | 0.049 | 0.571 |
|  | Present × Medium level | 0.045 | -0.023 | 0.114 | 0.196 |
| gFrontal | Present × Low level | -0.002 | -0.042 | 0.038 | 0.913 |
|  | Present × Medium level | -0.018 | -0.058 | 0.022 | 0.370 |
| gICVF | Present × Low level | 0.031 | -0.036 | 0.097 | 0.370 |
|  | Present × Medium level | 0.004 | -0.062 | 0.070 | 0.909 |
| gISOVF | Present × Low level | 0.060 | -0.005 | 0.124 | 0.070 |
|  | Present × Medium level | 0.068 | 0.004 | 0.132 | **0.036** |
| gOD | Present × Low level | -0.006 | -0.071 | 0.059 | 0.859 |
|  | Present × Medium level | 0.006 | -0.058 | 0.071 | 0.850 |
| gFA | Present × Low level | 0.032 | -0.034 | 0.099 | 0.337 |
|  | Present × Medium level | 0.004 | -0.062 | 0.070 | 0.905 |
| gMD | Present × Low level | 0.015 | -0.047 | 0.078 | 0.628 |
|  | Present × Medium level | 0.041 | -0.021 | 0.103 | 0.198 |

Note: Standardised betas (β) and 95% confidence intervals are reported in fully adjusted models. Bold type indicates FDR significant (q < 0.05). gFA, general factors of fractional anisotropy; gMD, general factors of mean diffusivity; gICVF, general factors of intracellular volume fraction; gISOVF, general factors of isotropic volume fraction; gOD, general factors of orientation dispersion.

Figure S1. Histogram of lifestyle scores


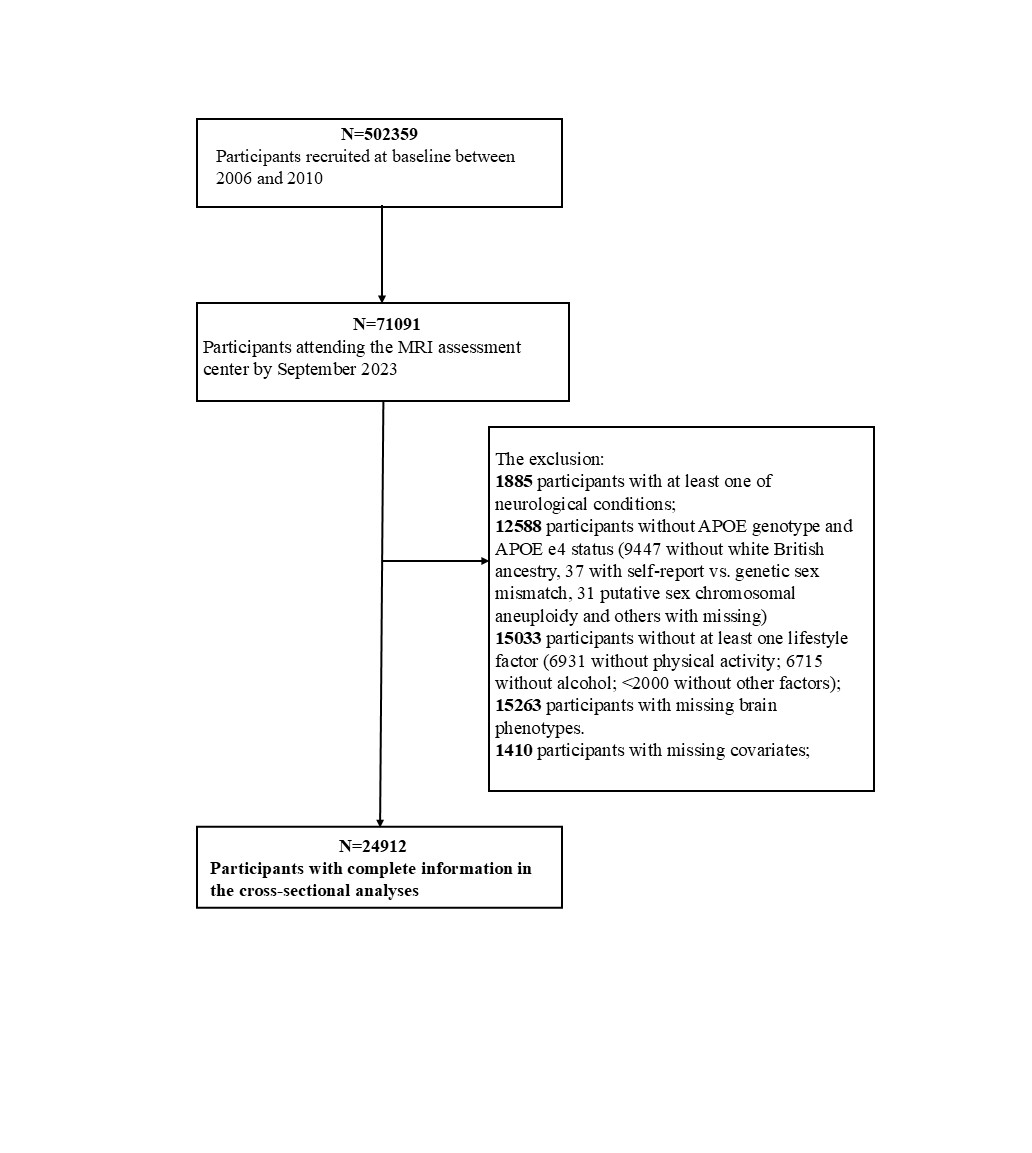


Figure S2. Flowchart of the study
